# Supplementary material for: A longitudinal study of plasma BAFF levels in mothers and their infants in Uganda, and correlations with subsets of B cells
Source: PubMed Central journal article supplement (PMC7815132; doi:10.1371/journal.pone.0245431), 2021-01-19

### Naïve B cells children

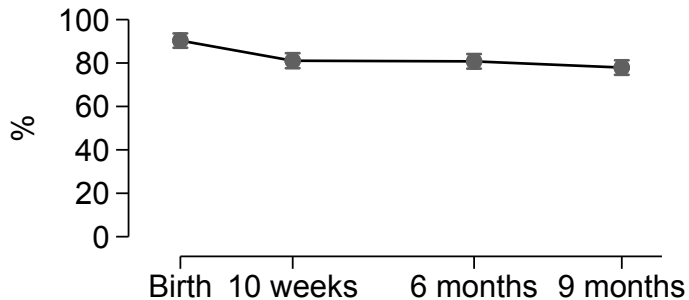

### Plasma cells children

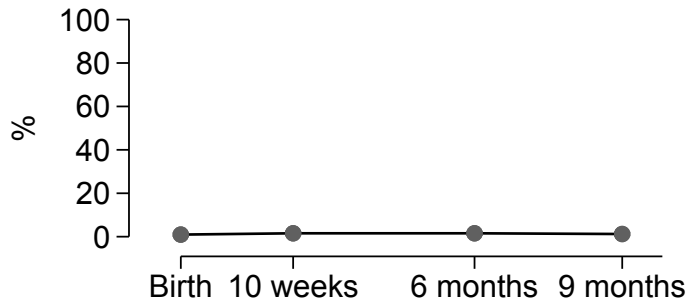

### IgG+ MBC children

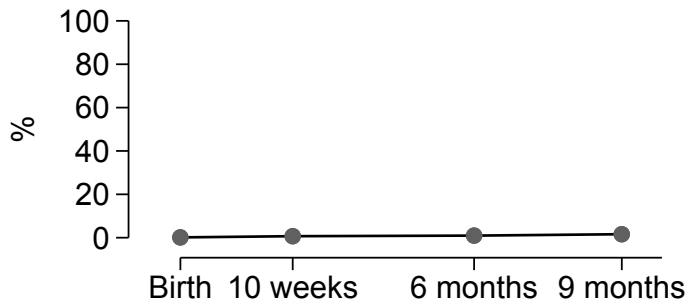

### CD27- MBC Children

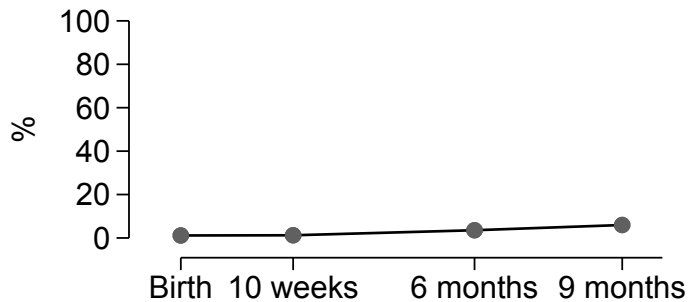

### Non-IgG+ MBC children

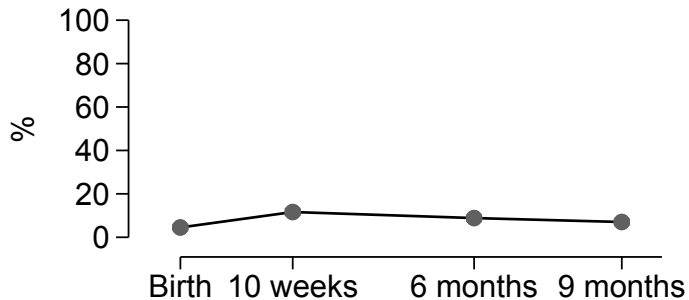

Supplement: pone.0245431.s002.pdf [file pone.0245431.s002.pdf]
