# Supplementary material for: A longitudinal study of plasma BAFF levels in mothers and their infants in Uganda, and correlations with subsets of B cells
Source: PubMed Central journal article supplement (PMC7815132; doi:10.1371/journal.pone.0245431), 2021-01-19
Supplement: pone.0245431.s003.pdf [file pone.0245431.s003.pdf]

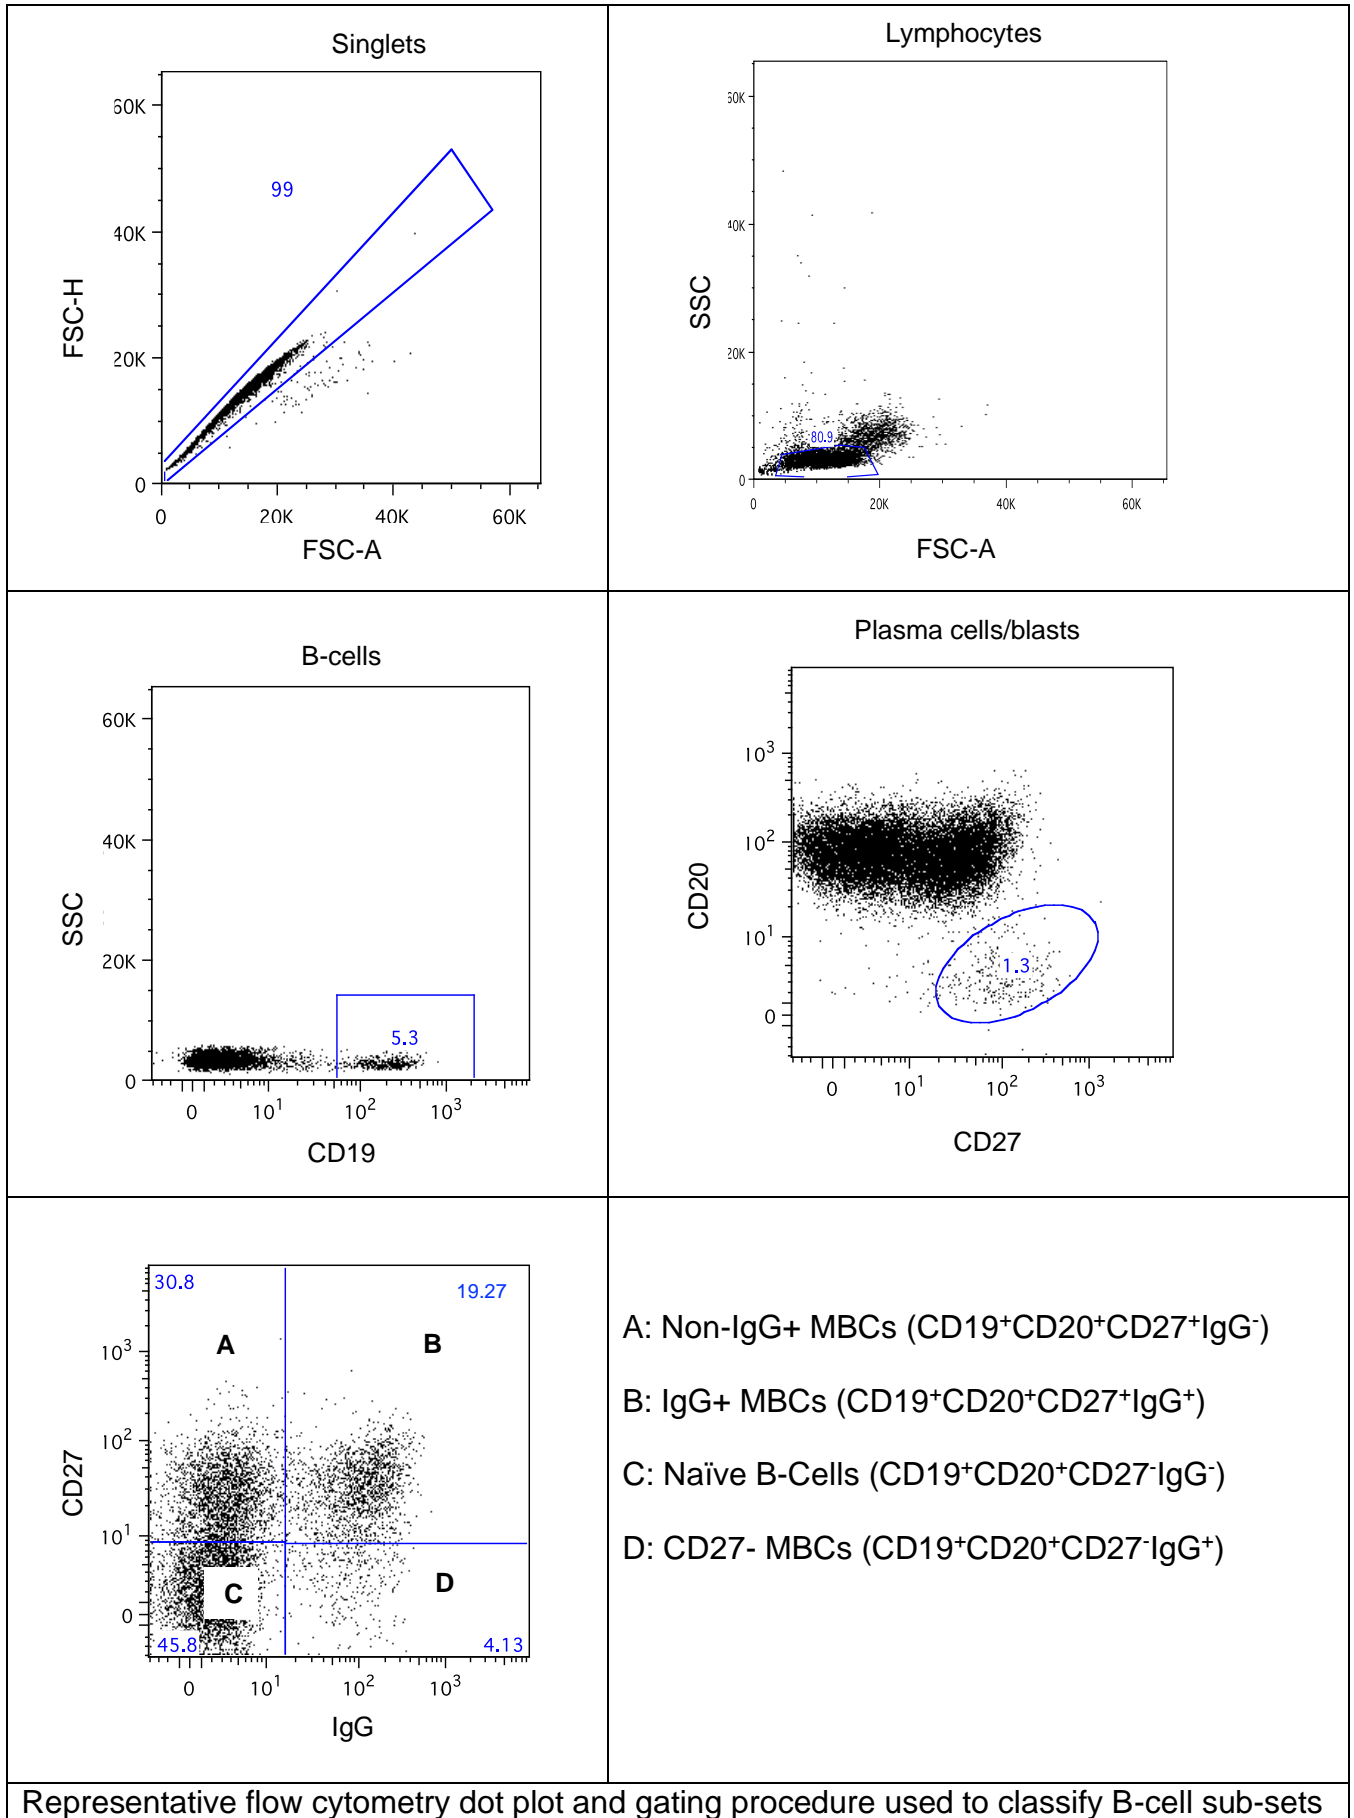

Representative flow cytometry dot plot and gating procedure used to classify B-cell sub-sets
