# Supplementary material for: A longitudinal study of plasma BAFF levels in mothers and their infants in Uganda, and correlations with subsets of B cells
Source: PubMed Central journal article supplement (PMC7815132; doi:10.1371/journal.pone.0245431), 2021-01-19
Supplement: pone.0245431.s013.pdf [file pone.0245431.s013.pdf]

Supplementary Data file 1: BAFF levels (pg/mL)

| <i>BabyNr</i> | Cord blood | Baby10week | Baby6month | Baby9month | <i>MotherNr</i> | MotherDeliv | Mother9month |
|---------------|------------|------------|------------|------------|-----------------|-------------|--------------|
| KB001         | 182        | 867        | 1166       | 951        | KM001           | 113         | 657          |
| KB002         | 2140       |            |            |            | KM002           | 661         |              |
| KB003         |            |            |            | 2359       | KM003           | 560         | 557          |
| KB004         | 1454       | 878        | 1060       | 1188       | KM004           | 540         | 1006         |
| KB005         | 1337       | 1019       | 762        | 2042       | KM005           | 530         | 1002         |
| KB006         | 1430       | 1226       | 1214       | 1097       | KM006           | 564         | 649          |
| KB007         | 1674       |            |            |            | KM007           | 690         |              |
| KB008         | 2642       | 1478       | 894        | 1569       | KM008           | 665         | 678          |
| KB009         | 1452       | 865        | 1094       | 1136       | KM009           | 686         | 949          |
| KB010         | 1397       | 892        | 1358       | 1150       | KM010           | 717         | 957          |
| KB011         | 3064       | 1963       | 1431       | 2060       | KM011           | 777         | 528          |
| KB012         | 1906       | 1128       | 1173       | 1642       | KM012           | 633         | 877          |
| KB013         | 4075       | 1025       | 2252       | 1808       | KM013           | 905         | 870          |
| KB014         | 2447       |            |            |            | KM014           | 647         |              |
| KB015         | 3120       | 1433       | 1137       | 876        | KM015           | 547         | 1042         |
| KB016         | 945        | 656        |            | 966        | KM016           | 663         | 712          |
| KB017         | 2250       |            |            |            | KM017           | 496         |              |
| KB018         | 1487       | 1243       | 1277       | 1122       | KM018           | 742         | 1158         |
| KB019         | 1754       | 836        | 1317       | 1157       | KM019           | 613         | 1061         |
| KB020         | 2260       | 950        | 1132       | 912        | KM020           | 645         | 592          |
| KB021         | 1514       | 987        | 1210       | 937        | KM021           | 715         | 928          |
| KB022         | 5050       |            |            | 1311       | KM022           | 619         | 746          |
| KB023         | 1800       | 1033       | 977        | 1721       | KM023           | 373         | 821          |
| KB024         | 1015       | 947        | 895        | 1295       | KM024           | 580         | 830          |
| KB025         | 2123       |            |            |            | KM025           | 873         |              |
| KB026         | 10472      | 1131       | 899        | 1791       | KM026           | 895         | 601          |
| KB027         | 2225       | 1322       | 1226       | 2591       | KM027           | 613         | 753          |
| KB028         | 1094       |            |            |            | KM028           | 541         |              |
| KB029         | 1317       |            |            |            | KM029           | 1002        |              |
| KB030         | 2316       | 1260       | 1606       | 1575       | KM030           | 750         | 1003         |
| KB031         | 791        | 1229       | 849        |            | KM031           | 1125        | 856          |
| KB032         | 1803       | 1040       | 2440       | 1178       | KM032           | 499         | 984          |
| KB033         | 2019       | 695        | 1780       | 1257       | KM033           | 822         | 742          |
| KB034         | 2586       | 1886       | 1901       | 1175       | KM034           | 573         | 938          |
| KB035         | 1871       |            |            |            | KM035           | 763         |              |
| KB036         | 2141       | 1098       | 742        | 1315       | KM036           | 665         | 912          |
| KB037         | 2923       | 865        |            | 1052       | KM037           | 772         | 849          |
| KB038         | 2988       | 1329       | 1228       | 1192       | KM038           | 660         | 711          |
| KB039         | 2548       | 1023       | 1803       |            | KM039           | 766         | 1220         |
| KB040         | 1797       | 1038       | 1994       | 1313       | KM040           | 727         | 616          |
| KB041         | 2489       | 1161       | 1596       | 479        | KM041           | 805         | 668          |
| KB042         | 2597       | 1172       | 2222       | 1351       | KM042           | 728         | 1134         |
| KB043         | 2849       | 1256       | 2540       | 1364       | KM043           | 735         | 924          |
| KB044         | 1670       |            |            |            | KM044           | 598         |              |
| KB045         | 2127       |            | 1629       | 1229       | KM045           | 853         | 1191         |
| KB046         | 1477       |            |            |            | KM046           | 356         |              |
| KB047         | 2779       |            | 1729       | 1563       | KM047           | 386         | 706          |
| KB048         | 1519       | 1030       | 2232       | 1377       | KM048           | 524         | 656          |
| KB049         | 1356       | 1152       | 2224       | 1192       | KM049           | 636         | 753          |
| KB050         | 2204       | 977        | 1407       | 3007       | KM050           | 560         | 861          |
| KB051         | 2369       | 2466       | 1481       | 1614       | KM051           | 690         | 1036         |
| KB052         | 1217       |            |            |            | KM052           | 457         |              |
| KB053         | 2442       |            | 1775       | 1446       | KM053           | 587         | 785          |

|       |      |      |      |      |       |      |      |
|-------|------|------|------|------|-------|------|------|
| KB054 | 1899 |      |      |      | KM054 | 849  |      |
| KB055 | 2461 | 743  | 2224 | 1539 | KM055 | 537  | 902  |
| KB056 | 2670 | 1217 | 5674 | 1343 | KM056 | 662  | 1167 |
| KB057 | 1829 | 983  | 1464 | 1172 | KM057 | 626  | 1181 |
| KB058 | 2299 | 917  | 1793 | 1813 | KM058 | 612  | 744  |
| KB059 | 1733 | 1176 | 1216 | 1316 | KM059 | 597  | 703  |
| KB060 | 2179 |      |      |      | KM060 | 1099 |      |
| KB061 | 1663 |      |      |      | KM061 | 1232 |      |
| KB062 | 2981 |      |      |      | KM062 | 531  |      |
| KB063 | 3098 | 1072 | 1913 | 3174 | KM063 | 498  | 887  |
| KB064 | 1410 | 1450 | 1598 | 2585 | KM064 | 674  | 527  |
| KB065 | 2845 |      |      |      | KM065 | 471  |      |
| KB066 | 2220 | 1016 | 1075 | 3163 | KM066 | 603  | 876  |
| KB067 | 1589 | 840  | 2140 | 1400 | KM067 | 731  | 569  |
| KB068 | 1600 | 985  | 1713 | 1605 | KM068 | 712  | 658  |
| KB069 | 3268 | 1753 | 1955 | 1500 | KM069 | 812  | 761  |
| KB070 | 1786 |      | 1640 | 1172 | KM070 | 736  | 828  |
| KB071 | 2126 | 784  | 2079 | 773  | KM071 | 492  | 835  |
| KB072 | 2293 | 1179 | 1990 | 1145 | KM072 | 684  | 536  |
| KB073 | 2326 | 824  | 1011 | 2376 | KM073 | 619  | 637  |
| KB074 | 2963 | 904  | 1066 | 1893 | KM074 | 1131 | 655  |
| KB075 | 2295 | 839  | 1342 | 1087 | KM075 | 740  | 392  |
| KB076 | 2583 | 920  | 1417 | 1097 | KM076 | 598  | 621  |
| KB077 | 1104 | 707  | 1466 | 1431 | KM077 | 707  | 845  |
| KB078 | 2103 | 1353 | 1159 | 1620 | KM078 | 656  | 806  |
| KB079 | 2783 | 1076 | 1336 | 1915 | KM079 | 524  | 750  |
| KB080 | 1264 |      | 1560 | 1367 | KM080 | 494  | 555  |
| KB081 | 1097 | 1018 | 1662 | 1582 | KM081 | 644  | 696  |
| KB082 | 1648 | 907  | 1382 | 605  | KM082 | 412  | 683  |
| KB083 | 1880 | 952  | 1328 | 1169 | KM083 | 599  | 735  |
| KB084 | 1379 | 1019 | 1311 | 1984 | KM084 | 580  | 716  |
| KB085 | 2095 |      | 1185 | 1599 | KM085 | 432  | 616  |
| KB086 | 2087 |      | 1008 | 1162 | KM086 | 591  | 598  |
| KB087 | 1383 | 927  | 727  | 1048 | KM087 | 622  | 487  |
| KB088 | 1431 | 977  | 1349 | 3251 | KM088 | 541  | 521  |
| KB089 | 2083 | 944  | 829  | 2440 | KM089 | 537  | 593  |
| KB090 | 2073 | 1005 | 1126 | 2378 | KM090 | 379  | 717  |
| KB091 | 2001 |      | 1927 | 1547 | KM091 | 537  | 673  |
| KB092 | 1917 | 935  | 1245 | 1238 | KM092 | 638  | 782  |
| KB093 | 2323 | 1101 | 2727 | 414  | KM093 | 594  | 521  |
| KB094 | 1342 | 752  | 1334 | 869  | KM094 | 564  | 526  |
| KB095 | 1506 | 1348 | 1782 | 1647 | KM095 | 501  | 633  |
| KB096 | 2160 | 1307 | 894  | 2428 | KM096 | 639  | 732  |
| KB097 | 1780 | 945  | 1956 | 1397 | KM097 | 523  | 584  |
| KB098 | 3817 | 807  | 1578 | 1270 | KM098 | 825  | 627  |
| KB099 | 1891 | 984  | 777  | 425  | KM099 | 489  | 543  |
| KB100 | 2633 | 935  | 969  | 1116 | KM100 | 396  | 456  |
| KB101 | 883  | 1214 | 1413 | 1683 | KM101 | 1790 | 456  |
| KB102 | 1730 | 984  | 1490 | 477  | KM102 | 901  | 751  |
| KB103 | 1135 | 799  | 1545 | 754  | KM103 | 313  | 647  |
| KB104 | 712  | 937  | 762  | 1067 | KM104 | 1270 | 490  |
| KB105 | 1192 | 1509 | 2059 | 758  | KM105 | 563  | 520  |
| KB106 | 1376 | 1241 | 1477 | 824  | KM106 | 544  | 418  |
| KB107 | 2231 | 2052 |      |      | KM107 | 505  |      |
| KB108 | 1805 | 864  | 2016 | 626  | KM108 | 622  | 851  |
| KB109 | 1438 | 2160 | 1039 | 947  | KM109 | 436  | 586  |

|       |      |      |      |      |       |      |     |
|-------|------|------|------|------|-------|------|-----|
| KB110 | 1672 | 2982 | 1340 | 776  | KM110 | 605  | 530 |
| KB111 | 644  | 2310 | 859  | 643  | KM111 | 2928 | 916 |
| KB112 | 1643 | 1283 | 2760 | 962  | KM112 | 751  | 559 |
| KB113 | 1841 | 2548 | 1283 | 780  | KM113 | 526  | 507 |
| KB114 | 2492 | 2054 | 1655 | 638  | KM114 | 702  | 454 |
| KB115 | 863  | 1220 | 1629 | 1068 | KM115 | 565  | 882 |
| KB116 | 1553 | 1670 | 2756 | 1264 | KM116 | 691  | 631 |
| KB117 | 3358 | 3036 | 1133 | 1528 | KM117 | 599  | 617 |
| KB118 | 1611 | 1106 | 1244 | 504  | KM118 | 778  | 739 |
| KB119 | 1746 | 1191 | 1058 | 358  | KM119 | 574  | 564 |
| KB120 | 2795 | 2737 | 2748 | 583  | KM120 | 603  | 487 |
| KB121 | 2758 | 1232 | 857  | 679  | KM121 | 727  | 620 |
| KB122 | 2984 | 1701 | 1333 | 633  | KM122 | 401  | 470 |
| KB123 | 2713 | 1095 | 1150 | 1357 | KM123 | 412  | 575 |
| KB124 | 1586 | 1051 | 993  | 1296 | KM124 | 690  | 551 |
| KB125 | 1807 | 2956 | 806  | 1257 | KM125 | 649  | 561 |
| KB126 | 2873 | 2528 | 939  | 1173 | KM126 | 1041 | 945 |
| KB127 | 2364 | 2757 | 1735 | 1237 | KM127 | 745  | 995 |
| KB128 | 2444 | 1382 | 604  | 1175 | KM128 | 708  | 839 |
| KB129 | 1341 | 1370 | 843  | 1542 | KM129 | 484  | 510 |
| KB130 | 1291 | 1254 | 950  | 1940 | KM130 | 526  | 588 |
| KB131 | 2475 | 1385 | 1074 | 1756 | KM131 | 854  | 812 |
